# Supplementary material for: Theoretical design of high-performance halogen anion batteries with MXene electrodes: influence of functional groups, metals, and anions
Source: Royal Society of Chemistry journal article supplement (doi:10.1039/d2ta04855h), 2022-01-01
Supplement: d2ta04855h1.pdf [file d2ta04855h1.pdf]

## Supplementary Information

### **Theoretical designing of high-performance halogen anion batteries with MXene electrodes: influence of functional groups, metals, and anions**

Jun Zhao<sup>a</sup>, Ninggui Ma<sup>a</sup>, Tairan Wang<sup>a</sup>, Na Li<sup>a</sup>, Yuhang Wang<sup>a</sup>, Jun Fan<sup>a, b\*</sup>

<sup>a</sup> *Department of Materials Science and Engineering, City University of Hong Kong, Hong Kong,  
China;*

<sup>b</sup> *Center for Advanced Nuclear Safety and Sustainable Development, City University of Hong  
Kong, Hong Kong, China;*

\* Corresponding author. E-mail: junfan@cityu.edu.hk

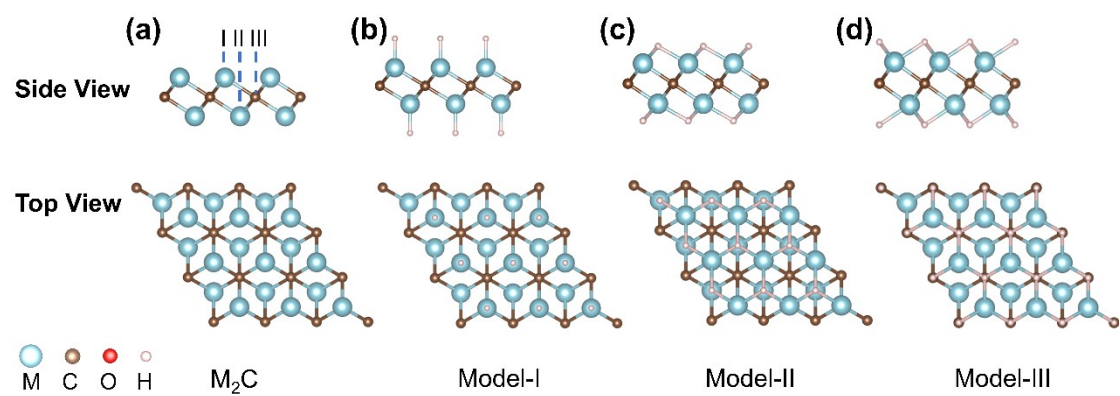

**Fig. S1** Side and top views of bare MXene (a), and three possible H-functionalized MXene models (b-d).

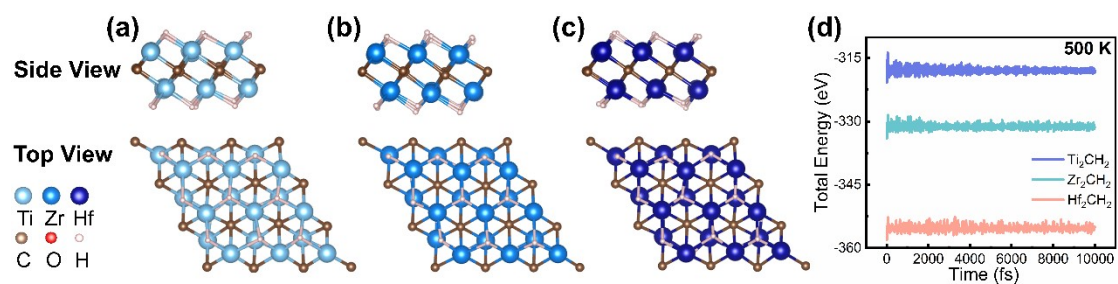

**Fig. S2** AIMD simulation results of H-functionalized MXenes: structure of  $\text{Ti}_2\text{CH}_2$  (a),  $\text{Zr}_2\text{CH}_2$  (b), and  $\text{Hf}_2\text{CH}_2$  (c) after 500 K, 10ps; variation curves in total energy of H-functionalized MXenes (d).

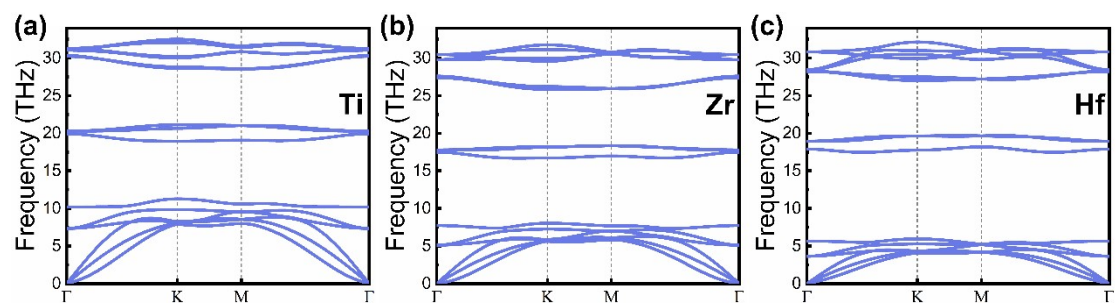

**Fig. S3** Phonon spectrum of H-functionalized MXenes:  $\text{Ti}_2\text{CH}_2$  (a),  $\text{Zr}_2\text{CH}_2$  (b),  $\text{Hf}_2\text{CH}_2$  (c).

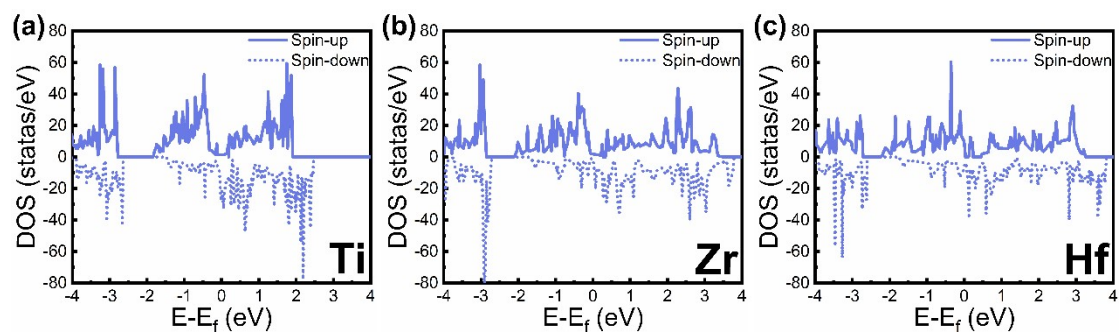

**Fig. S4** DOS curves of all bare MXenes:  $\text{Ti}_2\text{C}$  (a),  $\text{Zr}_2\text{C}$  (b),  $\text{Hf}_2\text{C}$  (c). The Fermi energy level was set to 0 eV.

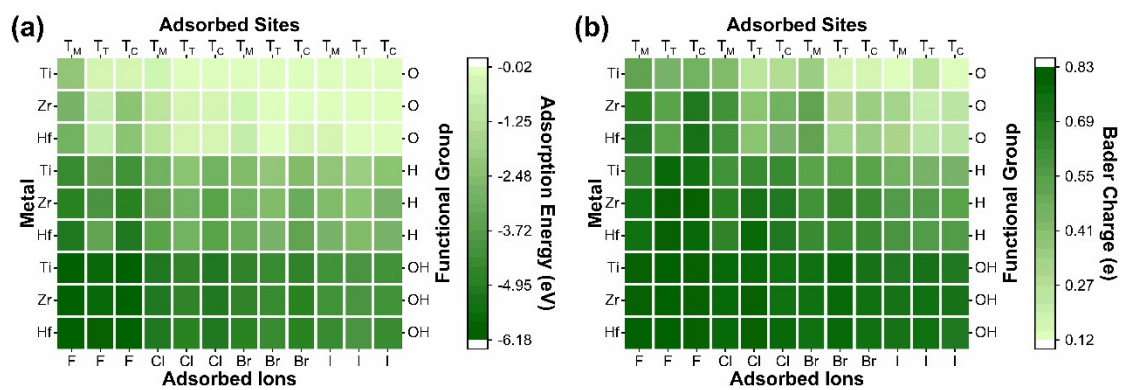

**Fig. S5** Heat-maps of adsorption energy (a) and Bader charge (b) for all adsorbed sites on all functionalized MXenes.

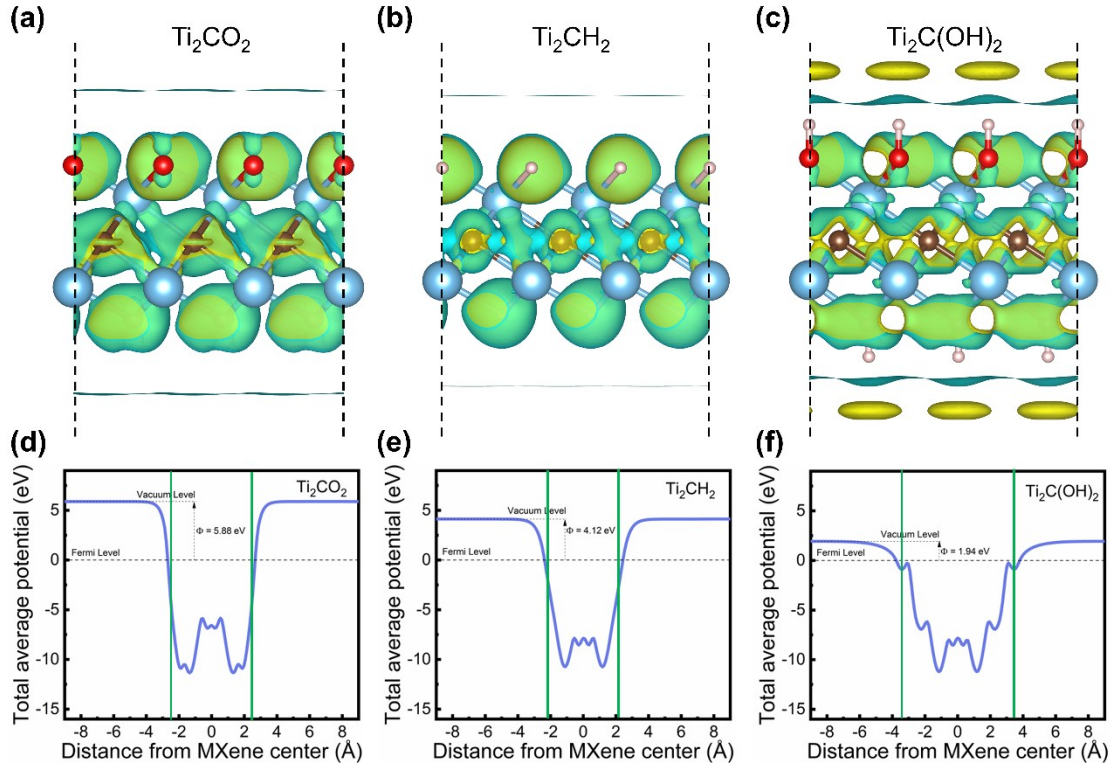

**Fig. S6** Differential charge density of  $\text{Ti}_2\text{CO}_2$  (a),  $\text{Ti}_2\text{CH}_2$  (b) and  $\text{Ti}_2\text{C}(\text{OH})_2$  (c); yellow region indicates charge accumulation, and blue region indicates charge loss; the value of the iso-surface was set to be  $0.00025 \text{ e}/\text{\AA}^3$ . Total averaged potential (blue solid lines) along the axis perpendicular to the surfaces of  $\text{Ti}_2\text{CO}_2$  (d),  $\text{Ti}_2\text{CH}_2$  (e), and  $\text{Ti}_2\text{C}(\text{OH})_2$  (f). The vertical green lines indicate the position of the outmost surface atoms. The Symbol  $\Phi$  represents the work function.

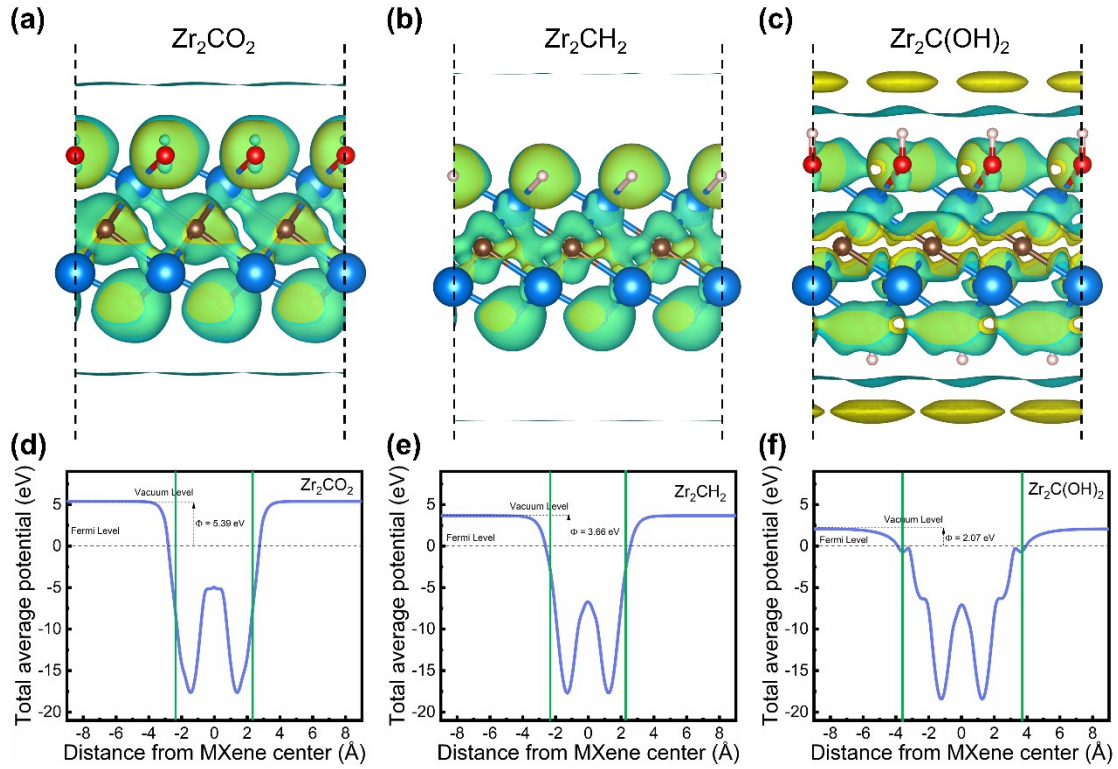

**Fig. S7** Differential charge density of  $\text{Zr}_2\text{CO}_2$  (a),  $\text{Zr}_2\text{CH}_2$  (b) and  $\text{Zr}_2\text{C}(\text{OH})_2$  (c); yellow region indicates charge accumulation, and blue region indicates charge loss; the value of the iso-surface was set to be  $0.00025 \text{ e}/\text{\AA}^3$ . Total averaged potential (blue solid lines) along the axis perpendicular to the surfaces of  $\text{Zr}_2\text{CO}_2$  (d),  $\text{Zr}_2\text{CH}_2$  (e), and  $\text{Zr}_2\text{C}(\text{OH})_2$  (f). The vertical green lines indicate the position of the outmost surface atoms. The Symbol  $\Phi$  represents the work function.

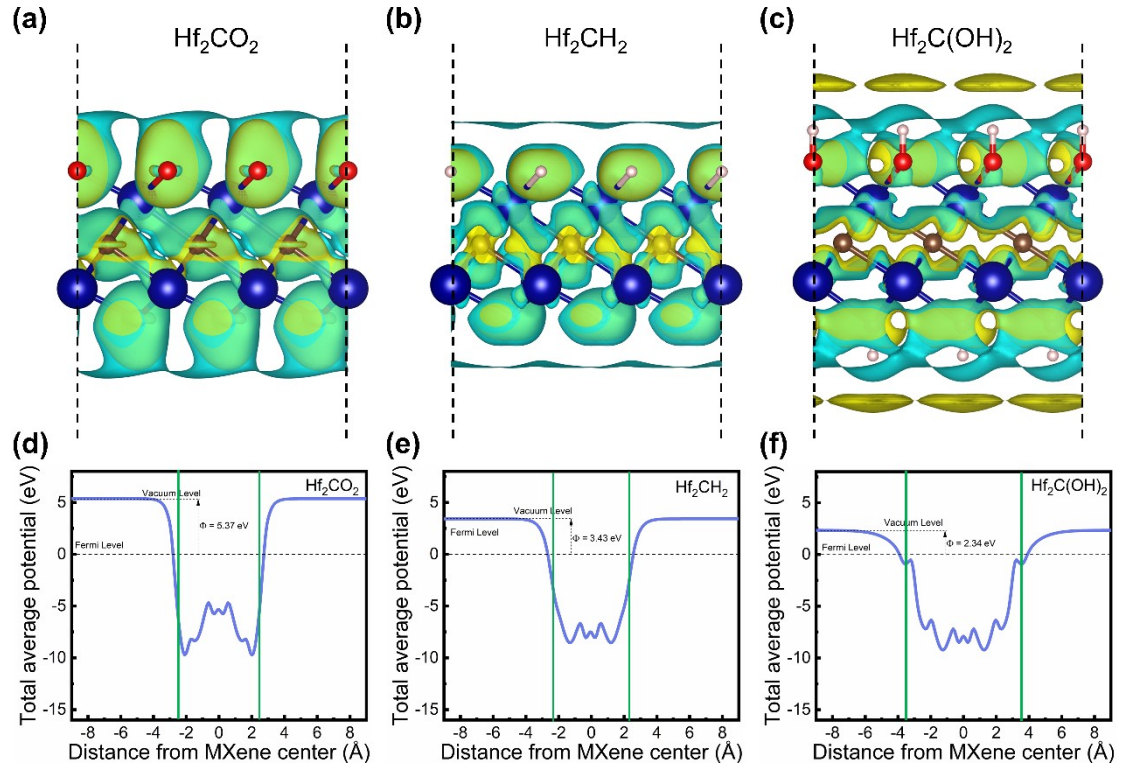

**Fig. S8** Differential charge density of  $\text{Hf}_2\text{CO}_2$  (a),  $\text{Hf}_2\text{CH}_2$  (b) and  $\text{Hf}_2\text{C}(\text{OH})_2$  (c); yellow region indicates charge accumulation, and blue region indicates charge loss; the value of the iso-surface was set to be  $0.00035 \text{ e}/\text{\AA}^3$ . Total averaged potential (blue solid lines) along the axis perpendicular to the surfaces of  $\text{Hf}_2\text{CO}_2$  (d),  $\text{Hf}_2\text{CH}_2$  (e), and  $\text{Hf}_2\text{C}(\text{OH})_2$  (f). The vertical green lines indicate the position of the outmost surface atoms. The Symbol  $\Phi$  represents the work function.



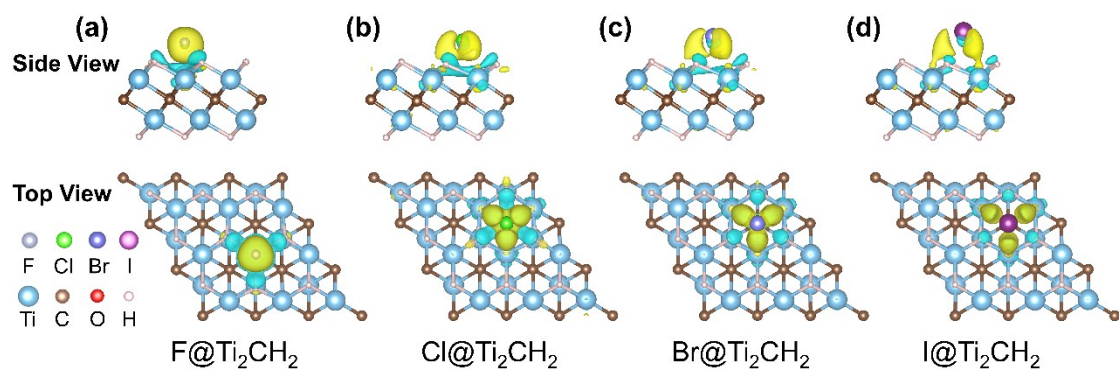

**Fig. S9** Differential charge density of absorbed halogen ions on  $\text{Ti}_2\text{CH}_2$  MXene; yellow region indicates charge accumulation, and blue region indicates charge loss. The value of the iso-surface was set to be  $0.035 \text{ e}/\text{\AA}^3$ .

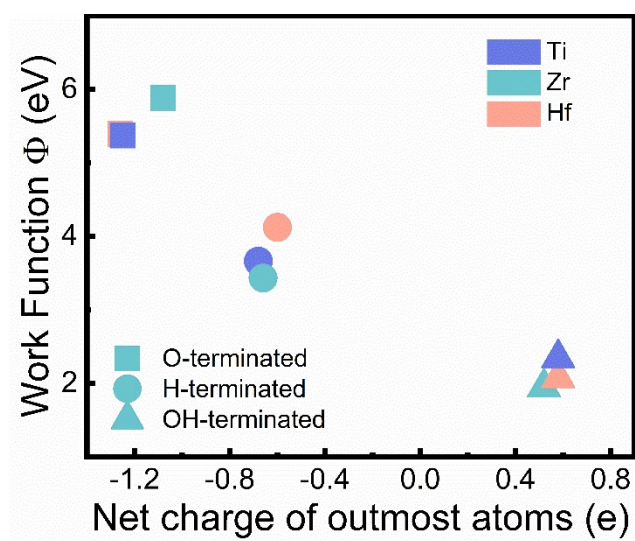

**Fig. S10** The function between the work function and the net charge of the surface atoms. The positive net charge means losing electrons and the negative charge means gaining electrons.

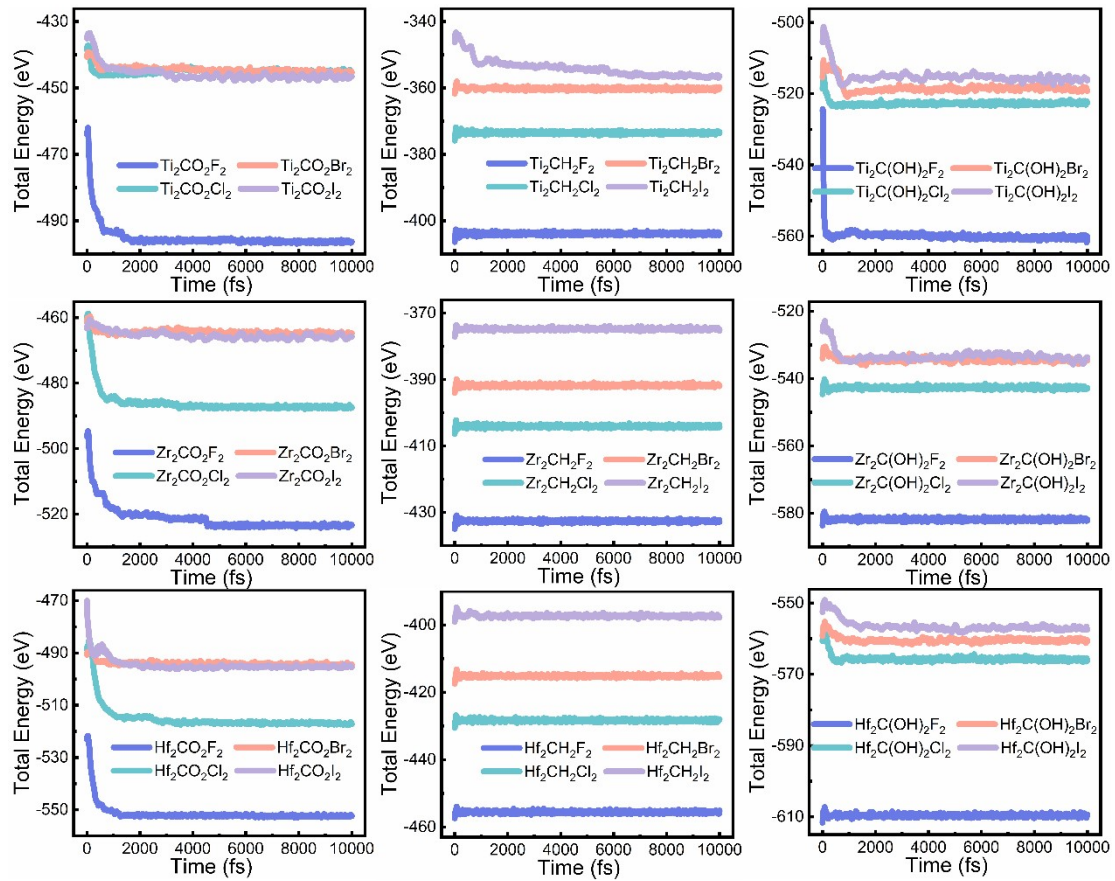

**Fig. S11** Variation curves in total energy for all monolayer adsorption models at the conditions of 300 K, 10 ps, and NVT ensemble.

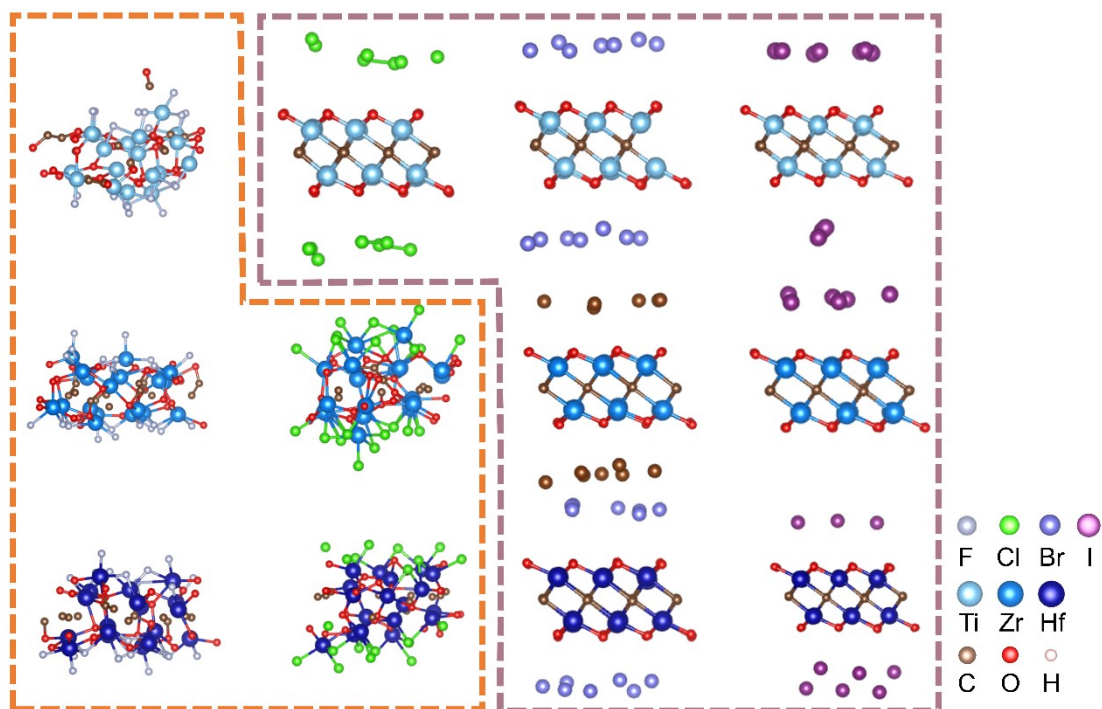

**Fig. S12** Configurations of monolayer adsorption models on O-functionalized MXenes after AIMD simulations at the conditions of 300 K, 10 ps, and NVT ensemble. Orange area represents “Broken” and brown area represent “Desorption”.

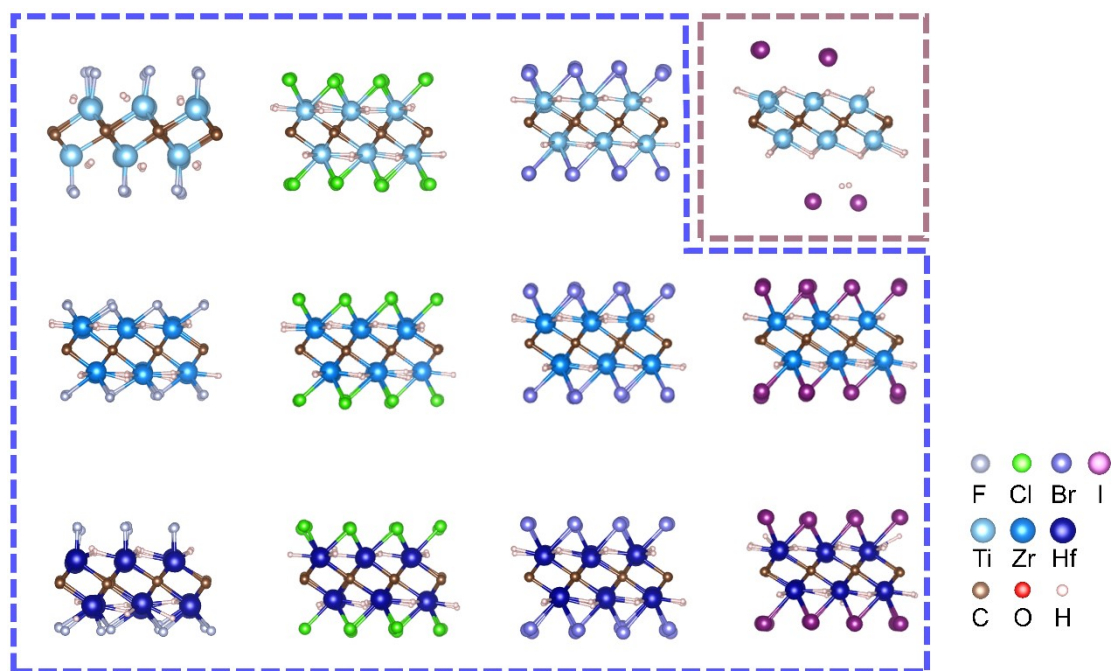

**Fig. S13** Configurations of monolayer adsorption models on H-functionalized MXenes after AIMD simulations at the conditions of 300 K, 10 ps, and NVT ensemble. Blue area represents “Stable” and brown area represent “Desorption”.

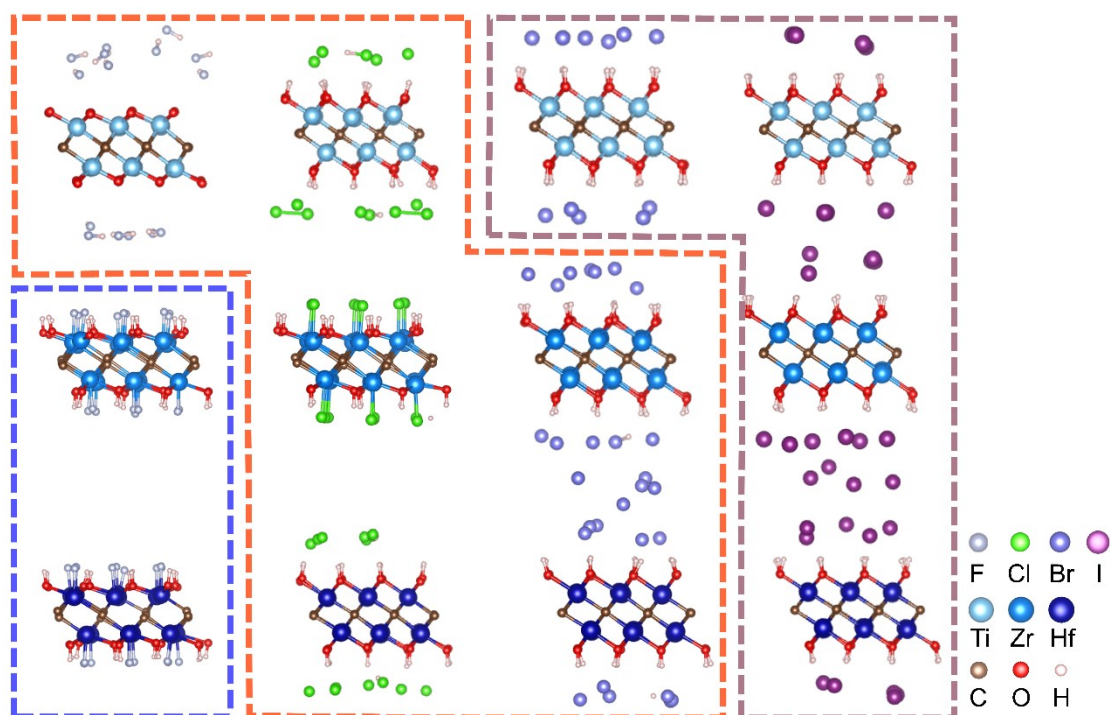

**Fig. S14** Configurations of monolayer adsorption models on OH-functionalized MXenes after AIMD simulations at the conditions of 300 K, 10 ps, and NVT ensemble. Blue area represents “Stable”; Orange area represents “Broken” and brown area represent “Desorption”.

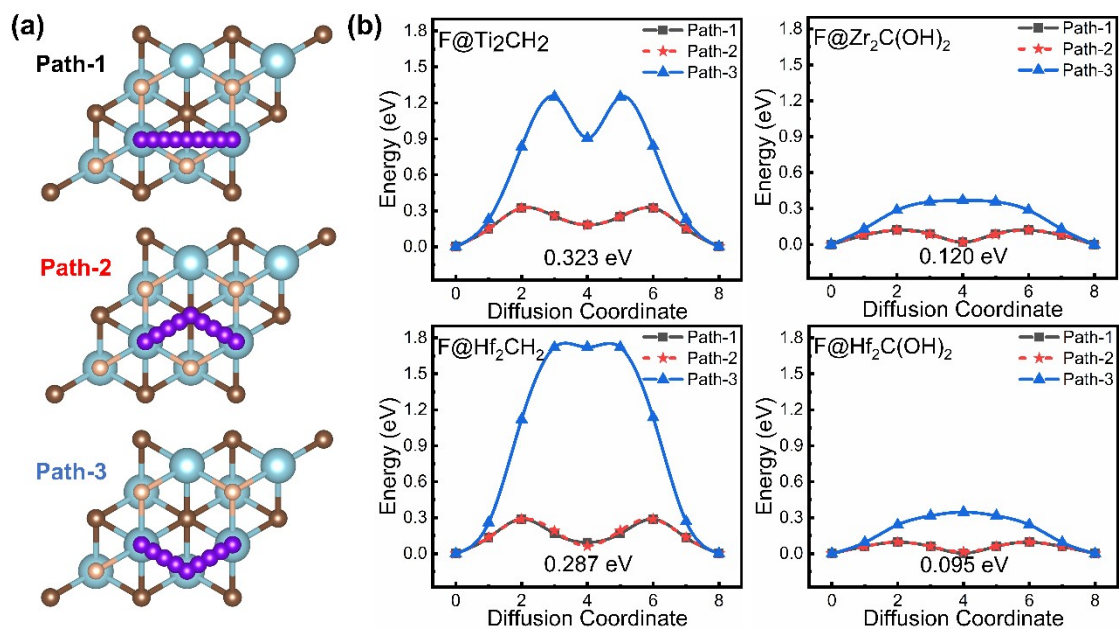

**Fig. S15** The diffusion paths for halogen ions stably adsorbed on the  $T_M$  site (a). The corresponding diffusion energy barriers of halogen ions on MXenes (b).

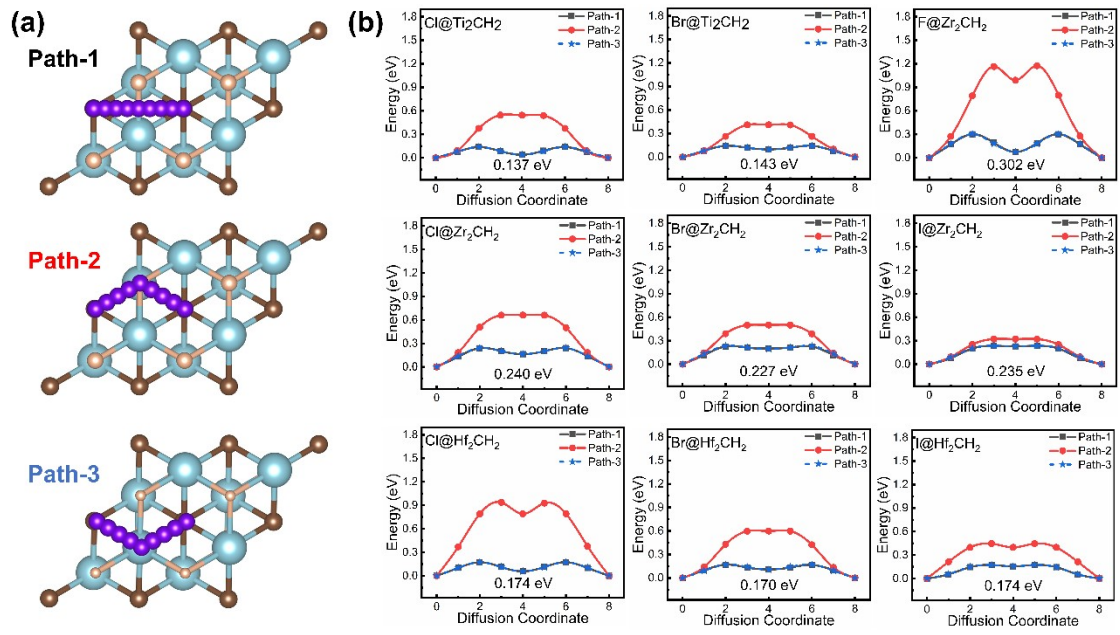

**Fig. S16** The diffusion paths for halogen ions stably adsorbed on the T<sub>c</sub> site (a). The corresponding diffusion energy barriers of halogen ions on MXenes (b).



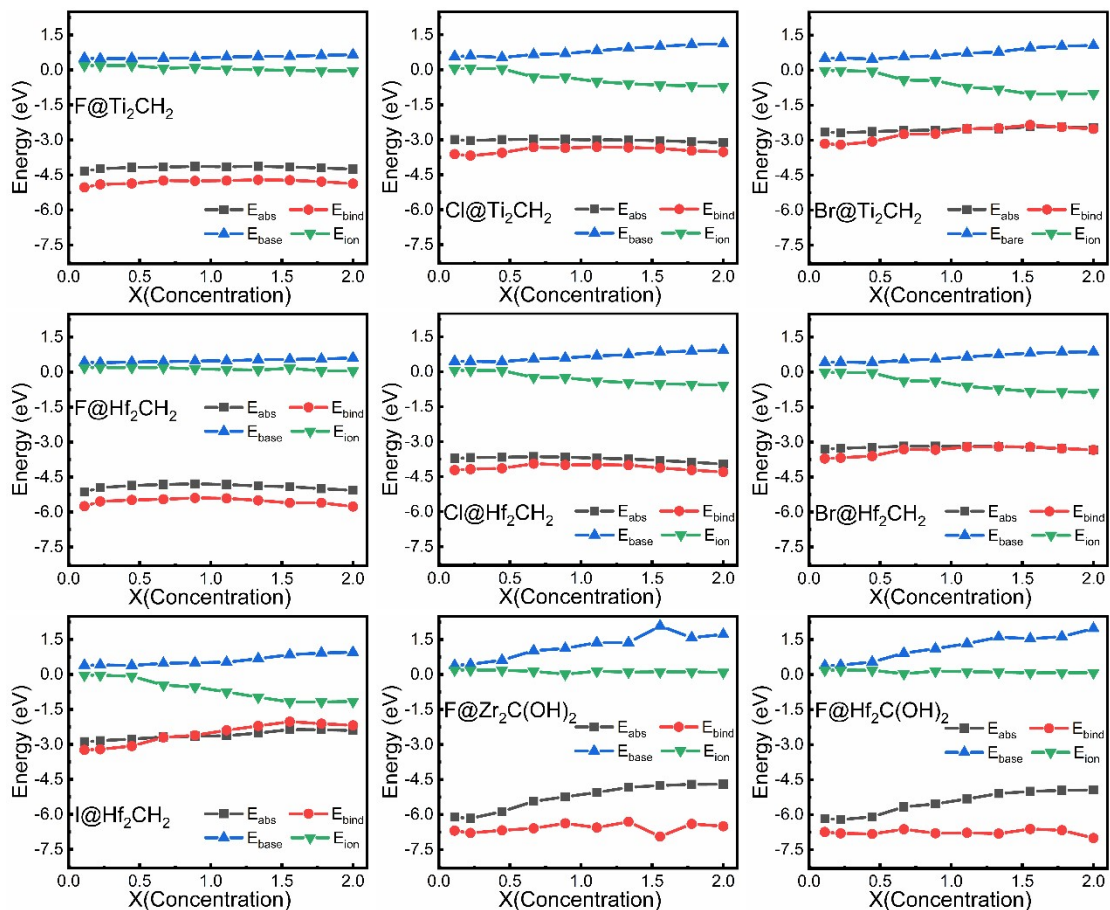

**Fig. S17** Energy variation curves with the concentration of inserted ions for halogen ions adsorbed on MXenes.

**Table S1** Optimized structure parameters and formation energy of all  $M_2CH_2$  MXene models.

| System     | Model | Parameter<br>$\alpha(\text{\AA})$ | Thickness<br>$d(\text{\AA})$ | Bond length( $\text{\AA}$ ) <sub>Nearest</sub> |       |       | Formation<br>energy (eV) |
|------------|-------|-----------------------------------|------------------------------|------------------------------------------------|-------|-------|--------------------------|
|            |       |                                   |                              | M-C                                            | M-M   | M-H   |                          |
| $Ti_2CH_2$ | I     | 3.168                             | 5.681                        | 2.130                                          | 2.850 | 1.747 | 0.676                    |
|            | II    | 3.010                             | 4.275                        | 2.088                                          | 2.894 | 1.995 | -2.876                   |
|            | III   | 2.942                             | 4.665                        | 2.084                                          | 2.953 | 2.037 | -2.191                   |
| $Zr_2CH_2$ | I     | 3.400                             | 6.236                        | 2.313                                          | 3.129 | 1.900 | 0.849                    |
|            | II    | 3.287                             | 4.550                        | 2.275                                          | 3.145 | 2.155 | -2.954                   |
|            | III   | 3.207                             | 5.934                        | 2.269                                          | 3.212 | 2.198 | -2.376                   |
| $Hf_2CH_2$ | I     | 3.306                             | 6.368                        | 2.286                                          | 3.154 | 1.879 | 0.673                    |
|            | II    | 3.233                             | 4.526                        | 2.239                                          | 3.098 | 2.130 | -3.013                   |
|            | III   | 3.171                             | 4.934                        | 2.239                                          | 3.160 | 2.178 | -2.408                   |

**Table S2** Optimized structure parameters of  $M_2CT_2$  MXenes.

| Model                              | Parameter<br>$\alpha(\text{\AA})$ | Thickness<br>$d(\text{\AA})$ | Bond length( $\text{\AA}$ ) <sub>Nearest</sub> |       |       |
|------------------------------------|-----------------------------------|------------------------------|------------------------------------------------|-------|-------|
|                                    |                                   |                              | M-C                                            | M-M   | M-T   |
| Ti <sub>2</sub> CO <sub>2</sub>    | 3.015                             | 4.440                        | 2.175                                          | 3.015 | 1.968 |
| Ti <sub>2</sub> CH <sub>2</sub>    | 3.010                             | 4.275                        | 2.088                                          | 2.894 | 1.995 |
| Ti <sub>2</sub> C(OH) <sub>2</sub> | 3.038                             | 6.794                        | 2.100                                          | 3.038 | 2.164 |
| Zr <sub>2</sub> CO <sub>2</sub>    | 3.295                             | 4.639                        | 2.359                                          | 3.295 | 2.115 |
| Zr <sub>2</sub> CH <sub>2</sub>    | 3.287                             | 4.550                        | 2.275                                          | 3.145 | 2.155 |
| Zr <sub>2</sub> C(OH) <sub>2</sub> | 3.294                             | 7.394                        | 2.267                                          | 2.295 | 2.340 |
| Hf <sub>2</sub> CO <sub>2</sub>    | 3.252                             | 4.611                        | 2.327                                          | 3.252 | 2.097 |
| Hf <sub>2</sub> CH <sub>2</sub>    | 3.233                             | 4.526                        | 2.239                                          | 3.098 | 2.130 |
| Hf <sub>2</sub> C(OH) <sub>2</sub> | 3.257                             | 7.058                        | 2.236                                          | 3.257 | 2.310 |

**Table S3** Comparison of electrochemical performance between this work and previous reports.

| Systems                                         | Type <sup>a</sup> | Capacity (mAh/g) | Max Working Voltage (V) <sup>b</sup> | Voltage Change (V) <sup>c</sup> | Diffusion energy barrier (eV) | Experiment or Calculation | Reference        |
|-------------------------------------------------|-------------------|------------------|--------------------------------------|---------------------------------|-------------------------------|---------------------------|------------------|
| BiF <sub>3</sub>                                | F                 | 126              | 2.61 vs Ce                           | -1.61                           | \                             | Exp.                      | Ref. 1           |
| LaSrMnO <sub>4</sub>                            | F                 | 100              | 2.00 vs PbF <sub>2</sub>             | -2.00                           | \                             | Exp.                      | Ref. 2           |
| La <sub>2</sub> CoO <sub>4</sub>                | F                 | 30               | 1.00 vs PbF <sub>2</sub>             | -2.00                           | \                             | Exp.                      | Ref. 3           |
| CuF <sub>2</sub>                                | F                 | 360              | 3.00 vs La                           | -2.00                           | \                             | Exp.                      | Ref. 4           |
| Ca <sub>2</sub> N                               | F                 | 285              | 2.31 vs PbF <sub>2</sub>             | \                               | 0.20                          | Cal.                      | Ref. 5           |
| Y <sub>2</sub> CF <sub>2</sub>                  | F                 | 282              | 2.01 vs PbF <sub>2</sub>             | \                               | 0.16                          | Cal.                      | Ref. 5           |
| Sr <sub>2</sub> NF                              | F                 | 141              | 2.21 vs PbF <sub>2</sub>             | \                               | \                             | Cal.                      | Ref. 5           |
| Ba <sub>2</sub> LiNF <sub>2</sub>               | F                 | 181              | 2.05 vs PbF <sub>2</sub>             | \                               | \                             | Cal.                      | Ref. 5           |
| Sr <sub>2</sub> TiO <sub>3</sub> F <sub>2</sub> | F                 | 198              | 2.01 vs PbF <sub>2</sub>             | \                               | \                             | Cal.                      | Ref. 5           |
| Sr <sub>2</sub> FeO <sub>3</sub> F              | F                 | 96               | 0.78 vs PbF <sub>2</sub>             | \                               | \                             | Cal.                      | Ref. 5           |
| <b>Ti<sub>2</sub>CH<sub>2</sub></b>             | <b>F</b>          | <b>488</b>       | <b>4.43 vs Li</b>                    | <b>-0.08</b>                    | <b>0.32</b>                   | <b>Cal.</b>               | <b>This Work</b> |
| <b>Zr<sub>2</sub>CH<sub>2</sub></b>             | <b>F</b>          | <b>273</b>       | <b>5.30 vs Li</b>                    | <b>+0.32</b>                    | <b>0.30</b>                   | <b>Cal.</b>               | <b>This Work</b> |
| <b>Hf<sub>2</sub>CH<sub>2</sub></b>             | <b>F</b>          | <b>144</b>       | <b>5.23 vs Li</b>                    | <b>-0.07</b>                    | <b>0.29</b>                   | <b>Cal.</b>               | <b>This Work</b> |
| <b>Zr<sub>2</sub>C(OH)<sub>2</sub></b>          | <b>F</b>          | <b>234</b>       | <b>6.21 vs Li</b>                    | <b>-1.23</b>                    | <b>0.12</b>                   | <b>Cal.</b>               | <b>This Work</b> |
| <b>Hf<sub>2</sub>C(OH)<sub>2</sub></b>          | <b>F</b>          | <b>133</b>       | <b>6.27 vs Li</b>                    | <b>-1.26</b>                    | <b>0.10</b>                   | <b>Cal.</b>               | <b>This Work</b> |
| FeOCl                                           | Cl                | 20               | 2.50 vs Mg                           | -1.80                           | \                             | Exp.                      | Ref. 6           |
| VOCl                                            | Cl                | 113              | 2.80 vs Li                           | -1.80                           | \                             | Exp.                      | Ref. 7           |
| CoFe-LDH                                        | Cl                | 160              | 3.00 vs Li                           | -1.80                           | 0.15                          | Exp. & Cal.               | Ref. 8           |
| CoOCl                                           | Cl                | 243              | 3.50 vs LiCl                         | -1.30                           | 0.37                          | Cal.                      | Ref. 9           |
| FeOCl                                           | Cl                | 250              | 2.60 vs LiCl                         | -1.20                           | 0.58                          | Cal.                      | Ref. 9           |
| VOCl                                            | Cl                | 262              | 3.60 vs LiCl                         | -1.50                           | 0.65                          | Cal.                      | Ref. 9           |
| Ti <sub>2</sub> C                               | Cl                | 331              | 4.00 vs Li                           | -0.50                           | 0.22                          | Cal.                      | Ref. 10          |
| Ti <sub>2</sub> C(OH) <sub>2</sub>              | Cl                | 126              | 3.50 vs Li                           | -2.00                           | 0.06                          | Cal.                      | Ref. 10          |
| <b>Ti<sub>2</sub>CH<sub>2</sub></b>             | <b>Cl</b>         | <b>488</b>       | <b>3.13 vs Li</b>                    | <b>+0.13</b>                    | <b>0.14</b>                   | <b>Cal.</b>               | <b>This Work</b> |
| <b>Zr<sub>2</sub>CH<sub>2</sub></b>             | <b>Cl</b>         | <b>273</b>       | <b>4.61 vs Li</b>                    | <b>+0.32</b>                    | <b>0.24</b>                   | <b>Cal.</b>               | <b>This Work</b> |
| <b>Hf<sub>2</sub>CH<sub>2</sub></b>             | <b>Cl</b>         | <b>144</b>       | <b>4.61 vs Li</b>                    | <b>+0.39</b>                    | <b>0.17</b>                   | <b>Cal.</b>               | <b>This Work</b> |
| MoS <sub>2</sub>                                | Br                | 151              | 1.78 vs Zn                           | -0.78                           | \                             | Exp.                      | Ref. 11          |
| Carbon Black                                    | Br                | 175              | 1.82 vs Zn                           | -1.40                           | \                             | Exp.                      | Ref. 12          |
| BiBr <sub>3</sub>                               | Br                | 157              | 0.60 vs PbBr <sub>2</sub>            | -0.60                           | \                             | Exp.                      | Ref. 13          |
| <b>Ti<sub>2</sub>CH<sub>2</sub></b>             | <b>Br</b>         | <b>488</b>       | <b>2.66 vs Li</b>                    | <b>-0.19</b>                    | <b>0.14</b>                   | <b>Cal.</b>               | <b>This Work</b> |
| <b>Zr<sub>2</sub>CH<sub>2</sub></b>             | <b>Br</b>         | <b>273</b>       | <b>2.55 vs Li</b>                    | <b>+0.20</b>                    | <b>0.28</b>                   | <b>Cal.</b>               | <b>This Work</b> |
| <b>Hf<sub>2</sub>CH<sub>2</sub></b>             | <b>Br</b>         | <b>144</b>       | <b>3.50 vs Li</b>                    | <b>+0.02</b>                    | <b>0.17</b>                   | <b>Cal.</b>               | <b>This Work</b> |
| Carbon Black                                    | I                 | 83               | 1.23 vs Zn                           | -0.83                           | \                             | Exp.                      | Ref. 14          |
| <b>Zr<sub>2</sub>CH<sub>2</sub></b>             | <b>I</b>          | <b>488</b>       | <b>2.65 vs Li</b>                    | <b>-0.23</b>                    | <b>0.24</b>                   | <b>Cal.</b>               | <b>This Work</b> |
| <b>Hf<sub>2</sub>CH<sub>2</sub></b>             | <b>I</b>          | <b>273</b>       | <b>2.76 vs Li</b>                    | <b>-0.48</b>                    | <b>0.17</b>                   | <b>Cal.</b>               | <b>This Work</b> |

<sup>a</sup> Only ion intercalation batteries are considered<sup>b</sup> + sign indicates an increase in voltage relative to the initial voltage, - sign indicates a decrease.

**Table S4** Contribution of each energy composition for adsorption energy for halogen ions adsorbed on  $Zr_2CH_2$  MXene.

| Type           | F             |              | Cl            |              | Br            |              | I             |              |
|----------------|---------------|--------------|---------------|--------------|---------------|--------------|---------------|--------------|
|                | Absolute (eV) | Relative (%) |
| Binding Energy | -0.691        | 213.8        | -0.221        | 56.8         | 0.233         | -115.2       | 0.920         | 394.1        |
| Bare Energy    | 0.549         | -169.9       | 0.445         | 114.5        | 0.376         | -185.9       | 0.427         | 182.8        |
| Ion Energy     | -0.181        | 56.1         | -0.613        | 157.7        | -0.810        | 401.2        | -1.113        | -476.9       |
| Total          | -0.323        | 100.0        | -0.389        | 100.0        | -0.202        | 100.0        | 0.233         | 100.0        |

## Supplementary Discussion 1

To explain the formation of nearly free electron gas (NFE) at the vacuum layer on H- and OH-functionalized MXenes, we conducted the calculation of the differential charge density and electrostatic potential. Here, we take  $\text{Hf}_2\text{CT}_2$  MXenes as examples, the corresponding differential charge density results are shown in Figure S8(a-c). The results show that charges will accumulate around the C atoms for all functionalized MXenes. And the O atoms in the O- and OH-functionalized MXenes accumulate more charges. Besides, no charge accumulation was found at the vacuum layer on the  $\text{Hf}_2\text{CH}_2$  surface, which may be ascribed to the low content of the nearly free electrons. Significant charge accumulation was found at the vacuum layer on  $\text{Hf}_2\text{C}(\text{OH})_2$ , which is consistent with the ELF results. Compared with  $\text{Hf}_2\text{CO}_2$ , the NFE states of  $\text{Hf}_2\text{C}(\text{OH})_2$  originate from the positive charge on the surface. Margine et al. studied the effect of positive surface charge on NFE states.<sup>15</sup> The results show that the NFE states are mainly concentrated near the maximum positive charge, and the NFE states will be closer to the Fermi level as the surface positive charge increases. Lu et al. proposed that surface dipoles also have a significant effect on NFE states.<sup>16</sup>

Since the NFE states can be only formed in the spatial regions away beyond the surfaces toward the vacuum in the electrostatic potential wells.<sup>17</sup> Therefore, the electrostatic potential can be better used to analyze the formation of NFE states. The calculated total average potentials of  $\text{Hf}_2\text{CO}_2$ ,  $\text{Hf}_2\text{CH}_2$  and  $\text{Hf}_2\text{C}(\text{OH})_2$  are shown in Figure S8(d-f). Since NFE states only occur in the vacuum region away from the surface, the tail shape of the electrostatic potential determines where the NFE states locate. It can be seen that the potential tail of  $\text{Hf}_2\text{C}(\text{OH})_2$  is shallower and more extended, while that of  $\text{Hf}_2\text{CO}_2$  is the deepest and narrowest. This means that the NFE electronic states of  $\text{Hf}_2\text{C}(\text{OH})_2$  will be found near the Fermi level, which is intuitively observed in the ELF diagram. Nevertheless, the NFE states of  $\text{Hf}_2\text{CO}_2$  will be transferred to higher energies that cannot be observed in the ELF diagram. The results of the differential charge density and the electrostatic potential of  $\text{Ti}_2\text{CT}_2$  and  $\text{Zr}_2\text{CT}_2$  MXenes can be found in Figure S6 and Figure S7, and similar conclusions can also be obtained.

The work function is the difference between the Fermi level and the vacuum level, which can effectively represent the shape and distribution of electrostatic potential. Here, we establish the function between the work function and the net charge of the surface atoms in Figure S10. We can

find that the OH-functionalized MXenes have the lowest work function and the highest amount of positive charge. So, the positive surface charge H leads to a lower work function, which in turn generates a large number of NFE states at Fermi Level. And the slightly negatively charged H-terminal may have few numbers of NFE states in ELF diagram while no NFE states can be observed on O-functionalized MXenes. Hence, the positive surface charge makes a significant effect on the location of NFE states, and the NFE states will be closer to the Fermi level as the surface positive charge increases. Besides, it should be emphasized that the work function and surface charge can only determine the occurrence position of NFE states and cannot quantify the content of NFE states.

## References

1. M. Anji Reddy and M. Fichtner, *J. Mater. Chem.*, 2011, **21**, 17059-17062.
2. M. A. Nowroozi, K. Wissel, J. Rohrer, A. R. Munnangi and O. Clemens, *Chem. Mater.*, 2017, **29**, 3441-3453.
3. M. A. Nowroozi, S. Ivlev, J. Rohrer and O. Clemens, *J. Mater. Chem. A*, 2018, **6**, 4658-4669.
4. D. T. Thieu, M. H. Fawey, H. Bhatia, T. Diemant, V. S. K. Chakravadhanula, R. J. Behm, C. Kübel and M. Fichtner, *Adv. Funct. Mater.*, 2017, **27**, 1701051.
5. S. T. Hartman and R. Mishra, *J. Mater. Chem. A*, 2020, **8**, 24469-24476.
6. X. Zhao, Q. Li, Z. Zhao, Karger, P. Gao, K. Fink, X. Shen and M. Fichtner, *ACS Appl. Mater. Interfaces*, 2014, **6**, 10997-11000.
7. P. Gao, M. A. Reddy, X. Mu, T. Diemant, L. Zhang, Z. Zhao-Karger, V. S. K. Chakravadhanula, O. Clemens, R. J. Behm and M. Fichtner, *Angew. Chem. Int. Ed.*, 2016, **55**, 4285-4290.
8. Q. Yin, D. Rao, G. Zhang, Y. Zhao, J. Han, K. Lin, L. Zheng, J. Zhang, J. Zhou and M. Wei, *Adv. Funct. Mater.*, 2019, **29**, 1900983.
9. M. Wu, X. Lv, J. Wang, R. Wang, X. Shi, H. Zhang, C. Jin, Y. Wei and R. Lian, *J. Mater. Chem. A*, 2021, **9**, 23169-23177.
10. D. Wang, Y. Gao, Y. Liu, Y. Gogotsi, X. Meng, G. Chen and Y. Wei, *J. Mater. Chem. A*, 2017, **5**, 24720-24727.
11. H. Zhao, M. Li, Z. Fang and Q. Su, *Inorg. Chem. Commun.*, 2021, **133**, 108873.
12. H. Li, M. Li, X. Zhou, T. Li and H. Zhao, *Sustain. Energ. Fuels*, 2020, **4**, 3871-3878.
13. A. Inoishi, M. Hokazono, E. Kashiwazaki, N. Setoguchi, T. Sakai, R. Sakamoto and S. Okada, *ChemElectroChem*, 2021, **8**, 246-249.
14. H. Li, M. Li, X. Zhou and T. Li, *J. Power Sources*, 2020, **449**, 227511.
15. E. R. Margine and V. H. Crespi, *Phys. Rev. Lett.*, 2006, **96**, 196803.
16. N. Lu, Z. Li and J. Yang, *J. Phys. Chem. C*, 2009, **113**, 16741-16746.
17. M. Khazaei, A. Ranjbar, M. Ghorbani-Asl, M. Arai, T. Sasaki, Y. Liang and S. Yunoki, *Phys. Rev. B*, 2016, **93**, 205125.
